# Supplementary material for: Temporal Evaluation of Insecticide Resistance in Populations of the Major Arboviral Vector Aedes Aegypti from Northern Nigeria
Source: Insects. 2022 Feb 10;13(2):187. doi: 10.3390/insects13020187 (PMC8876019; doi:10.3390/insects13020187)
Supplement: Supplementary file 1 [file insects-13-00187-s001.zip]

Archive with 5 entries (5 files):
- Figure S1.pdf
- Figure S2.pdf
- Figure S3.pdf
- File S1.xlsx
- File S2.xlsx
