# Supplementary material for: Temporal Evaluation of Insecticide Resistance in Populations of the Major Arboviral Vector Aedes Aegypti from Northern Nigeria
Source: Insects. 2022 Feb 10;13(2):187. doi: 10.3390/insects13020187 (PMC8876019; doi:10.3390/insects13020187)
Supplement: Supplementary file 1 [file insects-13-00187-s001.zip › Figure S1.pdf]

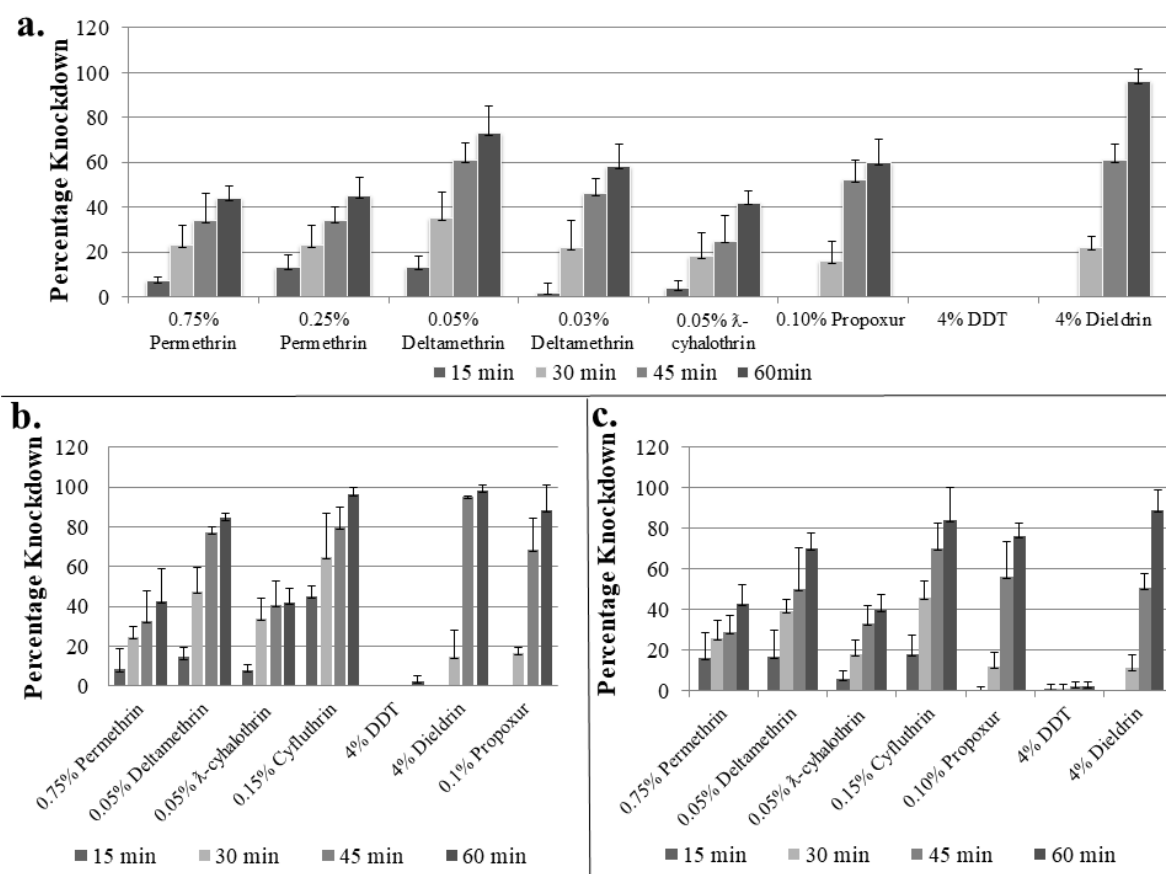

**Figure S1.** Results of WHO tubes bioassays with public health insecticides. Results are averages of percentage knockdown for 15, 30, 45 and 60 min, with error bars indicating standard deviations. (a–c) indicate results from 2020, 2019 and 2018, respectively for Kano populations.
