# Supplementary material for: Temporal Evaluation of Insecticide Resistance in Populations of the Major Arboviral Vector Aedes Aegypti from Northern Nigeria
Source: Insects. 2022 Feb 10;13(2):187. doi: 10.3390/insects13020187 (PMC8876019; doi:10.3390/insects13020187)
Supplement: Supplementary file 1 [file insects-13-00187-s001.zip › File S1.xlsx]

## Sheet: Row Data
			2018
			temephos bioassay
				raw data															% Mortality
		Temephos CONC. (PPM)	1ST REPLICATE		2ND REPLICATE		3RD REPLICATE		4TH REPLICATE
			DEAD	ALIVE	DEAD	ALIVE	DEAD	ALIVE	DEAD	ALIVE	Total Alive	Total Dead	Total	Corrected % mortality	Inverse Corrected % mortality		Temephos CONC. (PPM)	1ST REPLICATE	2nd REPLICATE	3rd REPLICATE	4th REPLICATE	Aveg % Mortality	Stdev	CORRECTED MORTALITY
		50	20	0	20	0	17	3	20	0	3	77	80	96.25	1.25		50	100	100	85	100	96.25	7.5	96.2025		0
		5	20	0	20	0	18	2	16	4	6	74	80	92.5	1.25		5	100	100	90	80	92.5	9.57427	92.4051		16.5
		0.5	16	4	11	9	19	1	15	5	19	61	80	76.25	1.25		0.5	80	55	95	75	76.25	16.5202	75.9494		45.6
		0.05	17	3	15	5	15	5	11	9	22	58	80	72.5	17.5		0.05	85	75	75	55	72.5	12.5831	72.1519		72.2
		0.005	3	17	4	16	6	14	4	16	63	17	80	21.25	21.25		0.005	15	20	30	20	21.25	6.29153	20.2532		75.9
		0.0005	7	13	2	18	3	17	2	18	66	14	80	17.5	72.5		0.0005	35	10	15	10	17.5	11.9024	16.4557		92.4
		5e-05	0	20	0	20	0	20	1	19	79	1	80	1.25	76.25		5e-05	0	0	0	5	1.25	2.5	0		96.2
		control H2O	0	20	1	19	0	20	0	20	59	1	80	1.25	92.5		control H2O	0	5	0	0	1.25	2.5
		control Eth.	0	20	0	20	1	19	0	20	59	1	80	1.25	96.25		control Eth.	0	0	5	0	1.25	2.5
																	Average control	0	2.5	2.5	0	1.25	2.5
					temephos 2019
		Temephos CONC. (PPM)	1ST REPLICATE		2ND REPLICATE		3RD REPLICATE		4TH REPLICATE
			DEAD	ALIVE	DEAD	ALIVE	DEAD	ALIVE	DEAD	ALIVE	Total Alive	Total Dead	Total	Corrected % mortality	Inverse Corrected % mortality		Temephos CONC. (PPM)	1ST REPLICATE	2nd REPLICATE	3rd REPLICATE	4th REPLICATE	Aveg % Mortality	Stdev	CORRECTED MORTALITY
		50	19	1	20	0	20	0	20	0	1	79	80	98.75	0		50	95	100	100	100	98.75	2.5	98.7013		7.8
		5	20	0	15	5	20	0	20	0	5	75	80	93.75	5		5	100	75	100	100	93.75	12.5	93.5065		20.8
		0.5	20	0	14	6	17	3	19	1	10	70	80	87.5	11.25		0.5	100	70	85	95	87.5	13.2288	87.013		31.2
		0.05	14	6	13	7	18	2	10	10	25	55	80	68.75	23.75		0.05	70	65	90	50	68.75	16.5202	67.5325		67.5
		0.005	6	14	8	12	8	12	11	9	47	33	80	41.25	41.25		0.005	30	40	40	55	41.25	10.3078	38.961		87
		0.0005	3	17	2	18	6	14	8	12	61	19	80	23.75	68.75		0.0005	15	10	30	40	23.75	13.7689	20.7792		93.5
		5e-05	1	19	1	19	3	17	4	16	71	9	80	11.25	87.5		5e-05	5	5	15	20	11.25	7.5	7.79221		98.7
		control H2O	1	19	0	20	3	17	0	20	56	4	80	5	93.75		control H2O	5	0	15	0	5	7.07107	1.2987
		control Eth.	0	20	0	20	0	20	2	18	60	0	80	0	98.75		control Eth.	0	0	0	10	2.5	5	-1.2987
																	Average control	2.5	0	7.5	5	3.75	6.03553	0
				temephos 2020
		Temephos CONC. (PPM)	1ST REPLICATE		2ND REPLICATE		3RD REPLICATE		4TH REPLICATE
			DEAD	ALIVE	DEAD	ALIVE	DEAD	ALIVE	DEAD	ALIVE	Total Alive	Total Dead	Total	Corrected % mortality	Inverse Corrected % mortality		Temephos CONC. (PPM)	1ST REPLICATE	2nd REPLICATE	3rd REPLICATE	4th REPLICATE	Aveg % Mortality	Stdev	CORRECTED MORTALITY
		50	20	0	20	0	20	0	20	0	0	80	80	100	1.25		50	100	100	100	100	100	0	100		6.3
		5	13	7	18	2	10	10	16	4	23	57	80	71.25	1.25		5	65	90	50	80	71.25	17.5	70.8861		12.7
		0.5	11	9	11	9	20	0	15	5	23	57	80	71.25	7.5		0.5	55	55	100	75	71.25	21.36	70.8861		58.2
		0.05	11	9	10	10	10	10	11	9	38	42	80	52.5	13.75		0.05	55	50	50	55	52.5	2.88675	51.8987		67.1
		0.005	7	13	7	13	11	9	12	8	43	37	80	46.25	46.25		0.005	35	35	55	60	46.25	13.1498	45.5696		70.9
		0.0005	2	18	4	16	3	17	2	18	69	11	80	13.75	52.5		0.0005	10	20	15	10	13.75	4.78714	12.6582		70.9
		5e-05	4	16	2	18	0	20	0	20	74	6	80	7.5	71.25		5e-05	20	10	0	0	7.5	9.57427	6.32911		100
		control H2O	0	20	1	19	0	20	0	20	59	1	80	1.25	71.25		control H2O	0	5	0	0	1.25	2.5	0
		control Eth.	1	19	0	20	0	20	0	20	59	1	80	1.25	100		control Eth.	5	0	0	0	1.25	2.5	0
																	Average control	2.5	2.5	0	0	1.25	2.5	0
					Deltamethrin 2018
		Deltamethrin CONC. (PPM)	1ST REPLICATE		2ND REPLICATE		3RD REPLICATE		4TH REPLICATE
			DEAD	ALIVE	DEAD	ALIVE	DEAD	ALIVE	DEAD	ALIVE	Total Alive	Total Dead	Total	Corrected % mortality	Inverse Corrected % mortality		Deltamethrin CONC. (PPM)	1ST REPLICATE	2nd REPLICATE	3rd REPLICATE	4th REPLICATE	Aveg % Mortality	Stdev	CORRECTED MORTALITY
		50	20	0	20	0	17	3	20	0	3	77	80	96.25	1.25		50	100	100	85	100	96.25	7.5	96.2025		1.3
		5	20	0	20	0	18	2	16	4	6	74	80	92.5	1.25		5	100	100	90	80	92.5	9.57427	92.4051		17.5
		0.5	16	4	11	9	19	1	15	5	19	61	80	76.25	1.25		0.5	80	55	95	75	76.25	16.5202	75.9494		46.3
		0.05	10	10	10	10	10	10	11	9	29	51	80	63.75	17.5		0.05	50	50	50	55	51.25	2.5	50.6329		72.5
		0.005	7	13	8	12	12	8	11	9	42	38	80	47.5	47.5		0.005	35	40	60	55	47.5	11.9024	46.8354		76.3
		0.0005	7	13	2	18	3	17	2	18	66	14	80	17.5	63.75		0.0005	35	10	15	10	17.5	11.9024	16.4557		92.5
		5e-05	0	20	0	20	0	20	1	19	79	1	80	1.25	76.25		5e-05	0	0	0	5	1.25	2.5	0		96.3
		control H2O	0	20	1	19	0	20	0	20	59	1	80	1.25	92.5		control H2O	0	5	0	0	1.25	2.5	0
		control Eth.	0	20	0	20	1	19	0	20	59	1	80	1.25	96.25		control Eth.	0	0	5	0	1.25	2.5	0
																	Average control	0	2.5	2.5	0	1.25	2.5	0
				Deltamethrin 2019
		Deltamethrin CONC. (PPM)	1ST REPLICATE		2ND REPLICATE		3RD REPLICATE		4TH REPLICATE
			DEAD	ALIVE	DEAD	ALIVE	DEAD	ALIVE	DEAD	ALIVE	Total Alive	Total Dead	Total	Corrected % mortality	Inverse Corrected % mortality		Deltamethrin CONC. (PPM)	1ST REPLICATE	2nd REPLICATE	3rd REPLICATE	4th REPLICATE	Aveg % Mortality	Stdev	CORRECTED MORTALITY
		50	20	0	19	1	20	0	20	0	1	79	80	98.75	1.25		50	100	95	100	100	98.75	2.5	98.7179		3.8
		5	11	9	15	5	17	3	13	7	24	56	80	70	2.5		5	55	75	85	65	70	12.9099	69.2308		18.8
		0.5	8	12	13	7	14	6	15	5	30	50	80	62.5	3.75		0.5	40	65	70	75	62.5	15.5456	61.5385		26.3
		0.05	6	14	12	8	8	12	11	9	43	37	80	46.25	16.25		0.05	30	60	40	55	46.25	13.7689	44.8718		43.8
		0.005	4	16	5	15	4	16	6	14	61	19	80	23.75	23.75		0.005	20	25	20	30	23.75	4.78714	21.7949		55
		0.0005	4	16	3	17	5	15	1	19	67	13	80	16.25	46.25		0.0005	20	15	25	5	16.25	8.53913	14.1026		70
		5e-05	0	20	2	18	1	19	0	20	77	3	80	3.75	62.5		5e-05	0	10	5	0	3.75	4.78714	1.28205		98.8
		control H2O	0	20	0	20	2	18	1	19	58	2	80	2.5	70		control H2O	0	0	10	5	3.75	4.78714	1.28205
		control Eth.	1	19	0	20	0	20	0	20	59	1	80	1.25	98.75		control Eth.	5	0	0	0	1.25	2.5	-1.28205
																	Average control	2.5	0	5	2.5	2.5	3.64357	0
					Deltamethrin 2020
		Deltamethrin CONC. (PPM)	1ST REPLICATE		2ND REPLICATE		3RD REPLICATE		4TH REPLICATE
			DEAD	ALIVE	DEAD	ALIVE	DEAD	ALIVE	DEAD	ALIVE	Total Alive	Total Dead	Total	Corrected % mortality	Inverse Corrected % mortality		Deltamethrin CONC. (PPM)	1ST REPLICATE	2nd REPLICATE	3rd REPLICATE	4th REPLICATE	Aveg % Mortality	Stdev	CORRECTED MORTALITY
		50	15	5	17	3	20	0	18	2	10	70	80	87.5	1.25		50	75	85	100	90	87.5	10.4083	87.3418		7.5
		5	15	5	13	7	12	8	14	6	26	54	80	67.5	1.25		5	75	65	60	70	67.5	6.45497	67.0886		13.8
		0.5	10	10	12	8	14	6	9	11	35	45	80	56.25	5		0.5	50	60	70	45	56.25	11.0868	55.6962		58.8
		0.05	5	15	5	15	8	12	10	10	52	28	80	35	13.75		0.05	25	25	40	50	35	12.2474	34.1772		51.3
		0.005	5	15	6	14	9	11	7	13	53	27	80	33.75	33.75		0.005	25	30	45	35	33.75	8.53913	32.9114		61.3
		0.0005	2	18	4	16	3	17	2	18	69	11	80	13.75	35		0.0005	10	20	15	10	13.75	4.78714	12.6582		73.8
		5e-05	2	18	2	18	0	20	0	20	76	4	80	5	56.25		5e-05	10	10	0	0	5	5.7735	3.79747		87.5
		control H2O	0	20	1	19	0	20	0	20	59	1	80	1.25	67.5		control H2O	0	5	0	0	1.25	2.5	0
		control Eth.	1	19	0	20	0	20	0	20	59	1	80	1.25	87.5		control Eth.	5	0	0	0	1.25	2.5	0
																	Average control	2.5	2.5	0	0	1.25	2.5

## Sheet: LC50 and RR
		Result of linear probit analysis using SPSS											RR= LC50/diagnostic concentration
	Temephos resistance level of three consecutive years from BUK																	temphos diagnostic conc=			0.012
insecticides	no	Slope (± SE)	LC25 (90%)	LC50	LC90(90%)	RR25	RR50	RR90		insecticides	no	Slope (± SE)	LC25 (90%)	LC50	LC90(90%)	RR25	RR50	RR90
2018	140	1.352(0.106)	0.001(0.000-0.001)	0.002(0.001-0.003)	0.018(0.012-0.029)	0.0833333	0.166667	1.5		2018	140	4.79	0.001	0.002	0.018	0.0833333	0.166667	1.5
2019	140	0.596(0.037)	0.001(0.000-0.004)	0.015(0.005-0.045)	2.18(0.543-19.987)	0.0833333	1.25	181.667		2019	140	0.596	0.001	0.015	2.18	0.0833333	1.25	181.667
2020	140	0.626(0.039)	0.001(0.001-0.002)	0.13(0.008-0.20)	1.458(0.773-3.142)	0.0833333	10.8333	121.5		2020	140	0.626	0.001	0.13	1.458	0.0833333	10.8333	121.5
		Result of linear probit analysis using SPSS
	Deltamethrin resistance level of three consecutive years from BUK																	deltamehrin diagnostic conc=			0.001
insecticides	no	Slope (± SE)	LC25 (90%)	LC50	LC90(90%)	RR25	RR50	RR90		insecticides	no	Slope (± SE)	LC25 (90%)	LC50	LC90(90%)	RR25	RR50	RR90
2018	140	0.469(0.032)	0.001(0.000-0.009)	0.021(0.010-0.295)	11.444(0.641-89383)	0.0833333	1.75	953.667		2018	140	0.469	0.001	0.021	11.444	1	21	11444
2019	140	0.382(0.29)	0.001(0.000-0.008)	0.047(0.004-0.0481)	105.557(5.002-289044)	0.0833333	3.91667	8796.42		2019	140	0.382	0.001	0.047	105.557	1	47	105557
2020	140	0.479(.032)	0.004(0.001-0.018	0.112(0.026-0.290)	53.533(7.023-2195.184)	0.333333	0.933333	4461.08		2020	140	0.479	0.004	0.112	53.533	4	112	53533
		Temephos and deltamethrin larval bioassay resistance level for three consecutive years from BUK
Column1	Column2	Column3	Column4	Column6	Column9
Larvicide	Collection Year	no	Slope (± SE)	LC50 (95% CI)	RR50
Temephos	2018	560	0.641 (0.039)	0.027 (0.008-0.092)	#DIV/0!
	2019	560	0.582 (0.037)	0.008 (0.005-0.013)	#DIV/0!
	2020	560	0.475 (0.032)	0.037 (0.006-0.219)	#DIV/0!
Deltamethrin	2018	560	0.588 (0.037)	0.018 (0.007-0.046)	#DIV/0!
	2019	560	0.505 (0.033)	0.100 (0.030-0.356)	#DIV/0!
	2020	560	0.416 (0.030)	0.198 (0.111 0.367)	#DIV/0!
	Combined Result for temephos and deltamethrin larval bioassay resistance level
Column1	Column2	Column3	Column4	Column5
Larvicide	no	Slope (± SE)	LC50 (95% CI)	RR50 (95% CI)
Deltamethrin	1920	0.487(0.032)	0.068 (0.041-0.114)	#DIV/0!
Temephos	420	0.55(0.035)	0.5 (0.02-0.012)	#DIV/0!
