# Supplementary material for: Temporal Evaluation of Insecticide Resistance in Populations of the Major Arboviral Vector Aedes Aegypti from Northern Nigeria
Source: Insects. 2022 Feb 10;13(2):187. doi: 10.3390/insects13020187 (PMC8876019; doi:10.3390/insects13020187)
Supplement: Supplementary file 1 [file insects-13-00187-s001.zip › File S2.xlsx]

## Sheet: 2018 ROW DATA
			ROW DATA				WHO TUBE BIOASSAY								ROW DATA IN PERCENTAGE (%)
	Insecticide	No. of Mosq.	Dead 0min	kd 15min	kd 30min	kd 45min	kd 60min	dead 24hrs	alive 24hrs				Insecticide	kd 15min	kd 30min	kd 45min	kd 60min	dead 24hrs
	Perm1	20	0	4	6	10	12	19	1				Perm1	20	30	50	60	95
	Perm2	20	0	0	4	5	8	17	3				Perm2	0	20	25	40	85
	Perm3	21	0	1	5	5	6	15	6				Perm3	4.7619	23.8095	23.8095	28.5714	71.4286
													averag morty	8.25397	24.6032	32.9365	42.8571	83.8095
													std dev	10.4473	5.04702	14.7894	15.9079	11.8307
	DELTAMETHRIN 0.05%
	INSECTICIDE	No. of Mosq.	DEAD 0MIN	KD 15MIN	KD 30MIN	KD 45MIN	KD 60MIN	DEAD 24HRS	ALIVE 24HRS				INSECTICIDE	KD 15MIN	KD 30MIN	KD 45MIN	KD 60MIN	DEAD 24HRS
	DELTAMETHRIN_1	24	0	3	10	18	21	22	2				DELTAMETHRIN_1	12.5	41.6667	75	87.5	91.6667
	DELTAMETHRIN_2	23	0	2	11	17	19	20	3				DELTAMETHRIN_2	8.69565	47.8261	73.913	82.6087	86.9565
	DELTAMETHRIN_3	25	0	5	16	20	21	20	5				DELTAMETHRIN_3	20	64	80	84	80
	DELTAMETHRIN_4	24	0	4	9	19	20	18	6				DELTAMETHRIN_4	16.6667	37.5	79.1667	83.3333	75
													averag morty	14.4656	47.7482	77.0199	84.3605	83.4058
													std dev	4.92037	11.6353	3.01232	2.16874	7.37352
	Insecticide	No. of Mosq.	Dead 0min	kd 15min	kd 30min	kd 45min	kd 60min	dead 24hrs	alive 24hrs				Insecticide	kd 15min	kd 30min	kd 45min	kd 60min	dead 24hrs
	cyfluthrin1	20	0	9	15	18	19	20	0				cyfluthrin1	45	75	90	95	100
	cyfluthrin2	20	0	10	16	16	20	19	1				cyfluthrin2	50	80	80	100	95
	cyfluthrin3	20	0	8	8	14	19	19	1				cyfluthrin3	40	40	70	95	95
	CONTROL	20	0	0	0	0	0	0	20				averag morty	45	65	80	96.6667	96.6667
													std dev	5	21.7945	10	2.88675	2.88675
	Insecticide	No. of Mosq.	Dead 0min	kd 15min	kd 30min	kd 45min	kd 60min	dead 24hrs	alive 24hrs				Insecticide	kd 15min	kd 30min	kd 45min	kd 60min	dead 24hrs
	ƛ-cyhalothrin	22	0	2	7	6	8	16	6				ƛ-cyhalothrin	9.09091	31.8182	27.2727	36.3636	72.7273
	ƛ-cyhalothrin	20	0	2	5	9	10	15	5				ƛ-cyhalothrin	10	25	45	50	75
	ƛ-cyhalothrin	20	0	1	9	10	8	15	5				ƛ-cyhalothrin	5	45	50	40	75
	CONTROL	20	0	0	0	0	0	0	20				averag morty	8.0303	33.9394	40.7576	42.1212	74.2424
													std dev	2.66339	10.1673	11.9428	7.06132	1.31216
	Insecticide	No. of Mosq.	Dead 0min	kd 15min	kd 30min	kd 45min	kd 60min	dead 24hrs	alive 24hrs				Insecticide	kd 15min	kd 30min	kd 45min	kd 60min	dead 24hrs
	DDT_1	24	0	0	0	0	1	1	23				DDT1	0	0	0	5	5
	DDT_2	23	0	0	0	0	0	0	23				DDT2	0	0	0	0	0
	DDT_3	25	0	0	0	0	1	1	24				DDT3	0	0	0	5	5
	DDT_4	25	0	0	0	0	0	0	25				DDT4	0	0	0	0	0
	COTROL	26	0	0	0	0	0	0	26				averag morty	0	0	0	2.5	2.5
													std dev	0	0	0	2.88675	2.88675
	Insecticide	No. of Mosq.	Dead 0min	kd 15min	kd 30min	kd 45min	kd 60min	dead 24hrs	alive 24hrs				Insecticide	kd 15min	kd 30min	kd 45min	kd 60min	dead 24hrs
	dieldrin	20	0	0	2	20	20	20	0				dieldrin	0	9.52381	95.2381	95.2381	95.2381
	dieldrin	20	0	0	1	19	20	19	1				dieldrin	0	5	95	100	95
	dieldrin	20	0	0	6	19	20	20	0				dieldrin	0	30	95	100	100
													averag morty	0	14.8413	95.0794	98.4127	96.746
													std dev	0	13.3213	0.137464	2.74929	2.82053
	Insecticide	No. of Mosq.	Dead 0min	kd 15min	kd 30min	kd 45min	kd 60min	dead 24hrs	alive 24hrs				Insecticide	kd 15min	kd 30min	kd 45min	kd 60min	dead 24hrs
	propoxur1	21	1	0	3	18	19	18	3				propoxur1	0	14.2857	85.7143	90.4762	85.7143
	propoxur2	20	0	0	4	13	15	16	4				propoxur2	0	20	65	75	80
	propoxur3	20	0	0	3	11	20	16	4				propoxur3	0	15	55	100	80
	CONTROL												averag morty	0	16.4286	68.5714	88.4921	81.9048
													std dev	0	3.1135	15.6655	12.6176	3.29914
	Insecticide	No. of Mosq.	Dead 0min	kd 15min	kd 30min	kd 45min	kd 60min	dead 24hrs	alive 24hrs				Insecticide	kd 15min	kd 30min	kd 45min	kd 60min	dead 24hrs
	fenitrothion1	20	0	0	0	1	0	20	0				fenitrothion1	0	0	5	0	100
	fenitrothion2	21	0	0	1	0	2	20	1				fenitrothion2	0	4.7619	0	9.52381	95.2381
	fenitrothion3	20	0	0	1	0	3	20	0				fenitrothion3	0	5	0	15	100
	fenitrothion4	20	0	0	0	0	0	20	0				fenitrothion4	0	0	0	0	100
	control	20	0	0	0	0	0	0	20				averag morty	0	2.44048	1.25	6.13095	98.8095
													std dev	0	2.8197	2.5	7.42403	2.38095
					SYNERGIST ASSAYS
	Insecticide	No. of Mosq.	Dead 0min	8%DEM(1HR)	kd 15min	kd 30min	kd 45min	kd 60min	dead 24hrs	alive 24hrs			Insecticide	kd 15min	kd 30min	kd 45min	kd 60min	dead 24hrs
	DDT1	20	0	0	0	2	2	2	6	14			DDT1	0	10	10	10	30
	DDT2	20	0	0	0	3	6	9	10	10			DDT2	0	14.2857	28.5714	42.8571	50
	DDT3	20	0	0	0	3	4	6	6	14			DDT3	0	15	20	30	30
	DDT4	20	0	0	1	2	8	8	7	13			DDT4	5	10	40	40	35
	CONTROL	20	0	0	0	0	0	0	0	20			averag morty	1.25	12.3214	24.6429	30.7143	36.25
													std dev	2.5	2.69637	12.7442	14.869	9.46485
	Insecticide	No. of Mosq.	Dead 0min	8%PBO (1HR)	kd 15min	kd 30min	kd 45min	kd 60min	dead 24hrs	alive 24hrs			Insecticide	kd 15min	kd 30min	kd 45min	kd 60min	dead 24hrs
	0.05% ƛ-cyhalothrin-1	21	0	0	8	12	15	20	20	1			0.05% ƛ-cyhalothrin-1	40	60	75	100	100
	0.05% ƛ-cyhalothrin-2	20	0	0	7	14	17	20	20	0			0.05% ƛ-cyhalothrin-2	33.3333	66.6667	80.9524	95.2381	100
	0.05% ƛ-cyhalothrin-3	24	0	0	3	9	17	20	20	4			0.05% ƛ-cyhalothrin-3	15	45	85	100	100
	0.05% ƛ-cyhalothrin-4	20	0	0	2	4	11	19	20	0			0.05% ƛ-cyhalothrin-4	10	20	55	95	100
	CONTROL	20	0	0	0	0	0	0	0	20			averag morty	24.5833	47.9167	73.9881	97.5595	100
													std dev	14.3614	20.6996	13.3083	2.8197	0
					QUANTITATIVE BIOASSAY
	Insecticide	No. of Mosq.	Dead 1hr	Dead-2hrs	Dead-3 hrs	Dead-4 hrs	Dead 5 hrs	Dead 6hrs	Dead 7hrs	Dead 8hrs	Dead 9Hrs		Insecticide	Dead 1hr	Dead-2hrs	Dead-3 hrs	Dead-4 hrs	Dead 5 hrs	Dead 6hrs	Dead 7hrs	Dead 8hrs	Dead 9Hrs
	4% DDT1	25	0	1	4	10	11	18	13	19	21		DDT1	0	4	16	40	44	72	52	76	84
	4% DDT2	25	0	1	2	8	12	11	17	20	20		DDT2	0	4	8	32	48	44	68	80	80
	4% DDT3	25	0	2	4	7	11	9	15	11	19		DDT3	0	8	16	28	44	36	60	44
	4% DDT4	25	0	1	6	4	9	11	9	13	23		DDT4	0	4	24	16	36	44	36	52	76
	CONTROL	20	0	0	0	0	0	0	0	0	0		average	0	5	16	29	43	49	54	63	80
													stdev	0	2	6.53197	10	5.03322	15.7903	13.6626	17.7012	4
								WHO CONE BIOASSAY
	INSECTICIDE	No OF MOSQ.	DEAD 0MIN	KD 1HR	DEAD 24HRS	ALIVE 24HRS		INSECTICIDE	No OF MOSQ.	DEAD 0MIN	KD 1HR	DEAD 24HRS
	Side-PermaNet®3.0-1	5	0	3	5			Roof-PermaNet®3.0-1	5	0	3	5
	Side-PermaNet®3.0-2	5	0	3	4			Roof-PermaNet®3.0-2	5	0	4	5
	Side-PermaNet®3.0-3	5	0	4	5			Roof-PermaNet®3.0-3	5	0	4	5
	Side-PermaNet®3.0-4	5	0	4	5			Roof-PermaNet®3.0-4	5	0	5	5
	Side-PermaNet®3.0-5	5	0	4	5			Roof-PermaNet®3.0-5	5	0	4	5
	Side-PermaNet®3.0-6	5	0	1	5			Roof-PermaNet®3.0-6	5	0	4	5
	Side-PermaNet®3.0-7	5	0	1	3			Roof-PermaNet®3.0-7	5	0	5	5
	Side-PermaNet®3.0-8	5	0	4	4			Roof-PermaNet®3.0-8	5	0	3	5
	Side-PermaNet®3.0-9	5	0	1	4			Roof-PermaNet®3.0-9	5	0	3	5
	Side-PermaNet®3.0-10	5	0	2	5			Roof-PermaNet®3.0-10	5	0	4	5
	Side-PermaNet®3.0-11	5	0	4	4			Roof-PermaNet®3.0-11	5	0	4	5
	Side-PermaNet®3.0-12	5	0	1	2			Roof-PermaNet®3.0-12	5	0	5	5
	Side-PermaNet®3.0-13	5	0	5	4			Roof-PermaNet®3.0-13	5	0	4	5
	Side-PermaNet®3.0-14	5	0	1	5			Roof-PermaNet®3.0-14	5	0	4	5
	Side-PermaNet®3.0-15	5	0	2	5			Roof-PermaNet®3.0-15	5	0	3	5
	Side-PermaNet®3.0-16	5	0	2	5			Roof-PermaNet®3.0-16	5	0	3	5
	Side-PermaNet®3.0-17	5	0	1	5			Roof-PermaNet®3.0-17	5	0	3	5
	Side-PermaNet®3.0-18	5	0	4	5			Roof-PermaNet®3.0-18	5	0	5	5
	Side-PermaNet®3.0-19	5	0	0	5			Roof-PermaNet®3.0-19	5	0	3	5
	Side-PermaNet®3.0-20	5	0	5	5			Roof-PermaNet®3.0-20	5	0	4	5
	Side-PermaNet®3.0-21	5	0	1	4			Roof-PermaNet®3.0-21	5	0	3	5
	Side-PermaNet®3.0-22	5	0	5	5			Roof-PermaNet®3.0-22	5	0	3	5
	Side-PermaNet®3.0-23	5	0	1	4			Roof-PermaNet®3.0-23	5	0	3	5
	Side-PermaNet®3.0-24	5	0	1	4			Roof-PermaNet®3.0-24	5	0	4	5
	Side-PermaNet®3.0-25	5	0	3	5			Roof-PermaNet®3.0-25	5	0	3	5
	Side-PermaNet®3.0-26	5	0	3	5			Roof-PermaNet®3.0-26	5	0	4	5
	Side-PermaNet®3.0-27	5	0	5	4			Roof-PermaNet®3.0-27	5	0	5	5
	Side-PermaNet®3.0-28	5	0	2	4			Roof-PermaNet®3.0-28	5	0	4	5
	Side-PermaNet®3.0-29	5	0	4	5			Roof-PermaNet®3.0-29	5	0	5	5
	Side-PermaNet®3.0-30	5	0	1	2			Roof-PermaNet®3.0-30	5	0	4	5
	Side-PermaNet®3.0-31	5	0	2	4			Roof-PermaNet®3.0-31	5	0	5	5
	Side-PermaNet®3.0-32	5	0	2	2			Roof-PermaNet®3.0-32	5	0	4	5
	Side-PermaNet®3.0-33	5	0	1	5			Roof-PermaNet®3.0-33	5	0	4	5
	Side-PermaNet®3.0-34	5	0	2	5			Roof-PermaNet®3.0-34	5	0	3	5
	Side-PermaNet®3.0-35	5	0	1	5			Roof-PermaNet®3.0-35	5	0	5	5
	Side-PermaNet®3.0-36	5	0	5	5			Roof-PermaNet®3.0-36	5	0	5	5
	Side-PermaNet®3.0-37	5	0	2	5			Roof-PermaNet®3.0-37	5	0	3	5
	Side-PermaNet®3.0-38	5	0	0	4			Roof-PermaNet®3.0-38	5	0	3	5
	Side-PermaNet®3.0-39	5	0	3	4			Roof-PermaNet®3.0-39	5	0	5	5
	Side-PermaNet®3.0-40	5	0	1	5			Roof-PermaNet®3.0-40	5	0	5	5
	Side-PermaNet®3.0-41	5	0	2	5			Roof-PermaNet®3.0-41	5	0	3	5
	Side-PermaNet®3.0-42	5	0	2	5			Roof-PermaNet®3.0-42	5	0	5	5
	Side-PermaNet®3.0-43	5	0	4	5			Roof-PermaNet®3.0-43	5	0	5	5
	Side-PermaNet®3.0-44	5	0	3	4			Roof-PermaNet®3.0-44	5	0	5	5
	Side-PermaNet®3.0-45	5	0	4	5			Roof-PermaNet®3.0-45	5	0	4	5
	Side-PermaNet®3.0-46	5	0	1	4			Roof-PermaNet®3.0-46	5	0	3	5
	Side-PermaNet®3.0-47	5	0	3	5			Roof-PermaNet®3.0-47	5	0	4	5
	Side-PermaNet®3.0-48	5	0	5	4			Roof-PermaNet®3.0-48	5	0	5	5
	Side-PermaNet®3.0-49	5	0	3	5			Roof-PermaNet®3.0-49	5	0	5	5
	Side-PermaNet®3.0-50	5	0	1	5			Roof-PermaNet®3.0-50	5	0	3	5
	Average	5	0	2.5	4.46			Average	5	0	3.98	5
	stdev		0	1.48805	0.813408			stdev		0	0.820403	0

## Sheet: 2019 RawData
						2019
		ROW DATA											ROW DATA IN PERCENTAGE (%)
Insecticide	No. of Mosq.	Dead 0min	kd 15min	kd 30min	kd 45min	kd 60min	dead 24hrs	alive 24hrs				Insecticide	kd 15min	kd 30min	kd 45min	kd 60min	dead 24hrs
0.75% Permethrin-1	25	0	1	9	6	14	20	5				0.75% Permethrin-1	4	36	24	56	80
0.75% Permethrin-2	25	0	8	4	5	9	21	4				0.75% Permethrin-2	32	16	20	36	84
0.75% Permethrin-3	25	0	2	6	9	9	16	9				0.75% Permethrin-3	8	24	36	36	64
0.75% Permethrin-4	25	0	5	7	9	11	17	8				0.75% Permethrin-4	20	28	36	44	68
												averag morty	16	26	29	43	74
												std dev	12.6491	8.32666	8.24621	9.45163	9.5219
INSECTICIDE	No. of Mosq.	DEAD 0MIN	KD 15MIN	KD 30MIN	KD 45MIN	KD 60MIN	DEAD 24HRS	ALIVE 24HRS				INSECTICIDE	KD 15MIN	KD 30MIN	KD 45MIN	KD 60MIN	DEAD 24HRS
0.05% DELTAMETHRIN_1	25	0	7	11	16	19	20	5				DELTAMETHRIN_1	28	44	64	76	80
0.05% DELTAMETHRIN_2	25	0	2	11	17	19	20	5				DELTAMETHRIN_2	8	44	68	76	80
0.05% DELTAMETHRIN_3	25	0	1	8	11	17	19	6				DELTAMETHRIN_3	4	32	44	68	76
0.05% DELTAMETHRIN_4	25	0	7	9	6	15	19	6				DELTAMETHRIN_4	28	36	24	60	76
												averag morty	17	39	50	70	78
												std dev	12.8062	6	20.2649	7.65942	2.3094
Insecticide	No. of Mosq.	Dead 0min	kd 15min	kd 30min	kd 45min	kd 60min	dead 24hrs	alive 24hrs				Insecticide	kd 15min	kd 30min	kd 45min	kd 60min	dead 24hrs
0.05% Cyfluthrin-1	25	0	6	11	19	22	22	3				0.05% Cyfluthrin-1	24	44	76	88	88
0.05% Cyfluthrin-2	25	0	2	9	20	24	25	0				0.05% Cyfluthrin-2	8	36	80	96	100
0.05% Cyfluthrin-3	25	0	7	12	13	15	18	7				0.05% Cyfluthrin-3	28	48	52	60	72
0.05% Cyfluthrin-4	25	0	3	14	18	23	25	0				0.05% Cyfluthrin-4	12	56	72	92	100
												averag morty	18	46	70	84	90
												std dev	9.5219	8.32666	12.4365	16.3299	13.2665
Insecticide	No. of Mosq.	Dead 0min	kd 15min	kd 30min	kd 45min	kd 60min	dead 24hrs	alive 24hrs				Insecticide	kd 15min	kd 30min	kd 45min	kd 60min	dead 24hrs
0.05% ƛ-cyhalothrin_1	25	0	1	2	11	12	12	13				0.05% ƛ-cyhalothrin_1	4	8	44	48	48
0.05% ƛ-cyhalothrin_2	25	0	3	6	7	9	16	9				0.05% ƛ-cyhalothrin_2	12	24	28	36	64
0.05% ƛ-cyhalothrin_3	25	0	1	5	6	8	14	11				0.05% ƛ-cyhalothrin_3	4	20	24	32	56
0.05% ƛ-cyhalothrin_4	25	0	1	5	9	11	17	8				0.05% ƛ-cyhalothrin_4	4	20	36	44	68
												averag morty	6	18	33	40	59
												std dev	4	6.9282	8.86942	7.30297	8.86942
Insecticide	No. of Mosq.	Dead 0min	kd 15min	kd 30min	kd 45min	kd 60min	dead 24hrs	alive 24hrs				Insecticide	kd 15min	kd 30min	kd 45min	kd 60min	dead 24hrs
4% DDT_1	25	0	1	1	1	1	1	24				DDT1	4	4	4	4	4
4% DDT_2	25	0	0	0	0	0	0	25				DDT2	0	0	0	0	0
4% DDT_3	25	0	0	0	1	1	1	24				DDT3	0	0	4	4	4
4% DDT_4	25	0	0	0	0	0	1	24				DDT4	0	0	0	0	4
COTROL	25	0	0	0	0	0	0	26				averag morty	1	1	2	2	3
												std dev	2	2	2.3094	2.3094	2
Insecticide	No. of Mosq.	Dead 0min	kd 15min	kd 30min	kd 45min	kd 60min	dead 24hrs	alive 24hrs				Insecticide	kd 15min	kd 30min	kd 45min	kd 60min	dead 24hrs
4% Dieldrin_1	25	0	0	1	13	23	25	0				4% Dieldrin_1	0	4	52	92	100
4% Dieldrin_2	25	0	0	3	12	22	21	4				4% Dieldrin_2	0	12	48	88	84
4% Dieldrin_3	25	0	0	5	11	25	22	3				4% Dieldrin_3	0	20	44	100	88
4% Dieldrin_4	25	0	0	2	15	19	25	0				4% Dieldrin_4	0	8	60	76	100
												averag morty	0	11	51	89	93
												std dev	0	6.8313	6.8313	10	8.24621
Insecticide	No. of Mosq.	Dead 0min	kd 15min	kd 30min	kd 45min	kd 60min	dead 24hrs	alive 24hrs				Insecticide	kd 15min	kd 30min	kd 45min	kd 60min	dead 24hrs
0.1% Propoxur-1	25	0	1	5	22	15	14	11				0.1% Propoxur-1	4	20	88	60	56
0.1% Propoxur-2	25	0	0	1	12	16	18	7				0.1% Propoxur-2	0	4	48	64	72
0.1% Propoxur-3	25	0	0	2	18	17	19	6				0.1% Propoxur-3	0	8	72	68	76
0.1% Propoxur-4	25	0	0	3	14	19	19	6				0.1% Propoxur-4	0	12	56	76	76
												std dev	1	11	66	67	70
													2	6.8313	17.7388	6.8313	9.5219
Insecticide	No. of Mosq.	Dead 0min	kd 15min	kd 30min	kd 45min	kd 60min	dead 24hrs	alive 24hrs				Insecticide	kd 15min	kd 30min	kd 45min	kd 60min	dead 24hrs
1% Fenitrothion1	25	0	0	0	0	0	25	0				fenitrothion1	0	0	0	0	100
1% Fenitrothion2	25	0	0	0	0	0	25	0				fenitrothion2	0	0	0	0	100
1% Fenitrothion3	25	0	0	0	0	0	25	0				fenitrothion3	0	0	0	0	100
1% Fenitrothion4	25	0	0	0	0	0	25	0				fenitrothion4	0	0	0	0	100
control	20	0	0	0	0	0	0	20				averag morty	0	0	0	0	100
												std dev	0	0	0	0	0
Insecticide	No. of Mosq.	Dead 0min	kd 15min	kd 30min	kd 45min	kd 60min	dead 24hrs	alive 24hrs				Insecticide	kd 15min	kd 30min	kd 45min	kd 60min	dead 24hrs
20% DDT_1	25	0	0	0	2	5	11	14				DDT1	0	0	8	20	44
20% DDT_2	25	0	0	0	3	8	9	16				DDT2	0	0	12	32	36
20% DDT_3	25	0	0	0	2	9	8	17				DDT3	0	0	8	36	32
20% DDT_4	25	0	0	0	4	10	14	11				DDT4	0	0	16	40	56
COTROL	25	0	0	0	0	0	0	25				averag morty	0	0	11	32	42
												std dev	0	0	3.82971	8.64099	10.583
Insecticide	No. of Mosq.	Dead 0min	kd 15min	kd 30min	kd 45min	kd 60min	dead 24hrs	alive 24hrs				Insecticide	kd 15min	kd 30min	kd 45min	kd 60min	dead 24hrs
40% DDT_1	25	0	1	3	11	12	18	7				DDT1	4	12	44	48	72
40% DDT_2	25	0	1	4	13	13	21	4				DDT2	4	16	52	52	84
40% DDT_3	25	0	1	3	9	14	19	6				DDT3	4	12	36	56	76
40% DDT_4	25	0	2	6	12	20	19	6				DDT4	8	24	48	80	76
COTROL	25	0	0	0	0	0	0	25				averag morty	5	16	45	59	77
												std dev	2	5.65685	6.8313	14.3759	5.03322
				SYNERGIST ASSAYS
Insecticide	No. of Mosq.	Dead 0min	8%DEM(1HR)	kd 15min	kd 30min	kd 45min	kd 60min	dead 24hrs	alive 24hrs			Insecticide	kd 15min	kd 30min	kd 45min	kd 60min	dead 24hrs
4% DDT_1	25	0	0	0	1	2	8	20	1			DDT1	0	0	4	8	32
4% DDT_2	25	0	0	0	2	5	9	18	0			DDT2	0	0	8	20	36
4% DDT_3	25	0	0	0	0	3	3	18	4			DDT3	0	0	0	12	12
4% DDT_4	25	0	0	0	0	3	8	22	0			DDT4	0	0	0	12	32
CONTROL	25	0	0	0	0	0	0	0	20			averag morty	0	0	3	13	28
												std dev	0	0	3.82971	5.03322	10.8321
Insecticide	No. of Mosq.	Dead 0min	8%PBO (1HR)	kd 15min	kd 30min	kd 45min	kd 60min	dead 24hrs	alive 24hrs			Insecticide	kd 15min	kd 30min	kd 45min	kd 60min	dead 24hrs
0.05% ƛ-cyhalothrin-1	25	0	0	6	8	12	19	20	1			0.05% ƛ-cyhalothrin-1	0	30	40	60	95
0.05% ƛ-cyhalothrin-2	25	0	1	4	9	18	20	20	0			0.05% ƛ-cyhalothrin-2	5	20	45	90	100
0.05% ƛ-cyhalothrin-3	25	0	0	4	15	15	20	20	4			0.05% ƛ-cyhalothrin-3	0	20	75	75	100
0.05% ƛ-cyhalothrin-4	25	0	0	7	11	20	20	20	0			0.05% ƛ-cyhalothrin-4	0	35	55	100	100
CONTROL	20	0	0	0	0	0	0	0	20			averag morty	1.25	26.25	53.75	81.25	98.75
												std dev	2.5	7.5	15.4785	17.5	2.5
				QUANTITATIVE BIOASSAY
Insecticide	No. of Mosq.	Dead 1hr	Dead-2hrs	Dead-3 hrs	Dead-4 hrs	Dead 5 hrs	Dead 6hrs	Dead 7hrs	Dead 8hrs	Dead 9Hrs		Insecticide	Dead 1hr	Dead-2hrs	Dead-3 hrs	Dead-4 hrs	Dead 5 hrs	Dead 6hrs	Dead 7hrs	Dead 8hrs	Dead 9Hrs
4% DDT1	25	0	2	5	9	8	15	10	15	19		DDT1	0	8	20	36	32	60	40	60	76	16
4% DDT2	25	0	6	6	11	9	12	15	9	21		DDT2	0	24	24	44	36	48	60	36	84	24
4% DDT3	25	2	3	5	7	11	10	11	10	20		DDT3	8	12	20	28	44	40	44	40	80	32
4% DDT4	25	0	5	8	5	11	7	13	17	24		DDT4	0	20	32	20	44	28	52	68	96	39
CONTROL	20	0	0	0	0	0	0	0	0	0		average	2	16	24	32	39	44	49	51	84	44
												stdev	4	7.30297	5.65685	10.328	6	13.466	8.86942	15.4488	8.64099	49
																						51
					WHO CONE BIOASSAY																	84
INSECTICIDE	No OF MOSQ.	DEAD 0MIN	KD 1HR	DEAD 24HRS	ALIVE 24HRS		INSECTICIDE	No OF MOSQ.	DEAD 0MIN	KD 1HR	DEAD 24HRS
Side-PermaNet®3.0-1	5	0	2	3			Roof-PermaNet®3.0-1	5	0	5	5
Side-PermaNet®3.0-2	5	0	3	3			Roof-PermaNet®3.0-2	5	0	3	5
Side-PermaNet®3.0-3	5	0	2	3			Roof-PermaNet®3.0-3	5	0	4	5
Side-PermaNet®3.0-4	5	0	3	4			Roof-PermaNet®3.0-4	5	0	3	5
Side-PermaNet®3.0-5	5	0	4	5			Roof-PermaNet®3.0-5	5	0	5	5
Side-PermaNet®3.0-6	5	0	4	4			Roof-PermaNet®3.0-6	5	0	5	5
Side-PermaNet®3.0-7	5	0	1	2			Roof-PermaNet®3.0-7	5	0	5	5
Side-PermaNet®3.0-8	5	0	3	3			Roof-PermaNet®3.0-8	5	0	4	5
Side-PermaNet®3.0-9	5	0	3	2			Roof-PermaNet®3.0-9	5	0	3	5
Side-PermaNet®3.0-10	5	0	1	3			Roof-PermaNet®3.0-10	5	0	4	5
Side-PermaNet®3.0-11	5	0	1	3			Roof-PermaNet®3.0-11	5	0	5	5
Side-PermaNet®3.0-12	5	0	2	5			Roof-PermaNet®3.0-12	5	0	5	5
Side-PermaNet®3.0-13	5	0	2	3			Roof-PermaNet®3.0-13	5	0	3	5
Side-PermaNet®3.0-14	5	0	2	5			Roof-PermaNet®3.0-14	5	0	3	5
Side-PermaNet®3.0-15	5	0	2	2			Roof-PermaNet®3.0-15	5	0	5	5
Side-PermaNet®3.0-16	5	0	1	3			Roof-PermaNet®3.0-16	5	0	4	5
Side-PermaNet®3.0-17	5	0	2	4			Roof-PermaNet®3.0-17	5	0	5	5
Side-PermaNet®3.0-18	5	0	2	4			Roof-PermaNet®3.0-18	5	0	4	5
Side-PermaNet®3.0-19	5	0	1	5			Roof-PermaNet®3.0-19	5	0	4	5
Side-PermaNet®3.0-20	5	0	1	2			Roof-PermaNet®3.0-20	5	0	4	5
Side-PermaNet®3.0-21	5	0	2	4			Roof-PermaNet®3.0-21	5	0	3	5
Side-PermaNet®3.0-22	5	0	2	5			Roof-PermaNet®3.0-22	5	0	3	5
Side-PermaNet®3.0-23	5	0	1	5			Roof-PermaNet®3.0-23	5	0	3	5
Side-PermaNet®3.0-24	5	0	5	3			Roof-PermaNet®3.0-24	5	0	5	5
Side-PermaNet®3.0-25	5	0	2	3			Roof-PermaNet®3.0-25	5	0	4	5
Side-PermaNet®3.0-26	5	0	4	4			Roof-PermaNet®3.0-26	5	0	4	5
Side-PermaNet®3.0-27	5	0	2	2			Roof-PermaNet®3.0-27	5	0	3	5
Side-PermaNet®3.0-28	5	0	2	2			Roof-PermaNet®3.0-28	5	0	4	5
Side-PermaNet®3.0-29	5	0	1	2			Roof-PermaNet®3.0-29	5	0	4	5
Side-PermaNet®3.0-30	5	0	2	4			Roof-PermaNet®3.0-30	5	0	3	5
Side-PermaNet®3.0-31	5	0	1	3			Roof-PermaNet®3.0-31	5	0	3	5
Side-PermaNet®3.0-32	5	0	2	5			Roof-PermaNet®3.0-32	5	0	5	5
Side-PermaNet®3.0-33	5	0	2	4			Roof-PermaNet®3.0-33	5	0	5	5
Side-PermaNet®3.0-34	5	0	4	3			Roof-PermaNet®3.0-34	5	0	3	5
Side-PermaNet®3.0-35	5	0	1	4			Roof-PermaNet®3.0-35	5	0	4	5
Side-PermaNet®3.0-36	5	0	3	3			Roof-PermaNet®3.0-36	5	0	4	5
Side-PermaNet®3.0-37	5	0	2	2			Roof-PermaNet®3.0-37	5	0	5	5
Side-PermaNet®3.0-38	5	0	3	4			Roof-PermaNet®3.0-38	5	0	3	5
Side-PermaNet®3.0-39	5	0	4	4			Roof-PermaNet®3.0-39	5	0	4	5
Side-PermaNet®3.0-40	5	0	2	3			Roof-PermaNet®3.0-40	5	0	3	5
Side-PermaNet®3.0-41	5	0	2	2			Roof-PermaNet®3.0-41	5	0	3	5
Side-PermaNet®3.0-42	5	0	1	5			Roof-PermaNet®3.0-42	5	0	5	5
Side-PermaNet®3.0-43	5	0	2	2			Roof-PermaNet®3.0-43	5	0	5	5
Side-PermaNet®3.0-44	5	0	1	2			Roof-PermaNet®3.0-44	5	0	4	5
Side-PermaNet®3.0-45	5	0	1	2			Roof-PermaNet®3.0-45	5	0	3	5
Side-PermaNet®3.0-46	5	0	5	5			Roof-PermaNet®3.0-46	5	0	3	5
Side-PermaNet®3.0-47	5	0	0	2			Roof-PermaNet®3.0-47	5	0	3	5
Side-PermaNet®3.0-48	5	0	1	3			Roof-PermaNet®3.0-48	5	0	4	5
Side-PermaNet®3.0-49	5	0	2	2			Roof-PermaNet®3.0-49	5	0	5	5
Side-PermaNet®3.0-50	5	0	2	4			Roof-PermaNet®3.0-50	5	0	5	5
Average	5	0	2.12	3.32			Average	5	0	3.96	5
stdev		0	1.11831	1.07741			stdev		0	0.832013	0

## Sheet: 2020 RAW DATA
						2020
		ROW DATA											ROW DATA IN PERCENTAGE (%)
Insecticide	No. of Mosq.	Dead 0min	kd 15min	kd 30min	kd 45min	kd 60min	dead 24hrs	alive 24hrs				Insecticide	kd 15min	kd 30min	kd 45min	kd 60min	dead 24hrs
0.75% Permethrin	25	0	2	7	9	11	17	8				0.75% Permethrin	8	28	36	44	68
0.75% Permethrin	25	0	1	8	10	10	15	10				0.75% Permethrin	4	32	40	40	60
0.75% Permethrin	25	0	2	3	4	10	18	7				0.75% Permethrin	8	12	16	40	72
0.75% Permethrin	25	0	2	5	11	13	21	4				0.75% Permethrin	8	20	44	52	84
control	25	0					0	25				averag morty	7	23	34	44	71
												std dev	2	8.86942	12.4365	5.65685	10
INSECTICIDE	No. of Mosq.	DEAD 0MIN	KD 15MIN	KD 30MIN	KD 45MIN	KD 60MIN	DEAD 24HRS	ALIVE 24HRS				INSECTICIDE	KD 15MIN	KD 30MIN	KD 45MIN	KD 60MIN	DEAD 24HRS
0.05% DELTAMETHRIN_1	25	0	2	12	17	21	22	3				0.05% DELTAMETHRIN_1	8	48	68	84	88
0.05% DELTAMETHRIN_2	25	0	4	8	14	18	19	6				0.05% DELTAMETHRIN_2	16	32	56	72	76
0.05% DELTAMETHRIN_3	25	0	5	7	16	18	18	7				0.05% DELTAMETHRIN_3	20	28	64	72	72
0.05% DELTAMETHRIN_4	25	0	2	8	14	16	19	6				0.05% DELTAMETHRIN_4	8	32	56	64	76
												averag morty	13	35	61	73	78
												std dev	6	8.86942	6	8.24621	6.9282
Insecticide	No. of Mosq.	Dead 0min	kd 15min	kd 30min	kd 45min	kd 60min	dead 24hrs	alive 24hrs				Insecticide	kd 15min	kd 30min	kd 45min	kd 60min	dead 24hrs
0.25% Permethrin-1	25	0	3	9	9	15	23	2				0.25% Permethrin	12	36	36	60	92
0.25% Permethrin-2	25	0	2	2	7	10	19	6				0.25% Permethrin	8	8	28	40	76
0.25% Permethrin-3	25	0	5	5	7	8	17	8				0.25% Permethrin	20	20	28	32	68
0.25% Permethrin-4	25	0	3	7	11	12	19	6				0.25% Permethrin	12	28	44	48	76
												averag morty	13	23	34	45	78
												std dev	5.03322	11.9443	7.65942	11.9443	10.0664
INSECTICIDE	No. of Mosq.	DEAD 0MIN	KD 15MIN	KD 30MIN	KD 45MIN	KD 60MIN	DEAD 24HRS	ALIVE 24HRS				INSECTICIDE	KD 15MIN	KD 30MIN	KD 45MIN	KD 60MIN	DEAD 24HRS
0.03% DELTAMETHRIN_1	25	0	0	3	11	17	25	0				0.03% DELTAMETHRIN_1	0	12	44	68	100
0.03% DELTAMETHRIN_2	25	1	2	7	10	15	21	4				0.03% DELTAMETHRIN_2	8	28	40	60	84
0.03% DELTAMETHRIN_3	25	0	0	9	14	15	17	8				0.03% DELTAMETHRIN_3	0	36	56	60	68
0.03% DELTAMETHRIN_4	25	0	0	3	11	11	22	3				0.03% DELTAMETHRIN_4	0	12	44	44	88
												averag morty	2	22	46	58	85
												std dev	4	12	6.9282	10.0664	13.2162
Insecticide	No. of Mosq.	Dead 0min	kd 15min	kd 30min	kd 45min	kd 60min	dead 24hrs	alive 24hrs				Insecticide	kd 15min	kd 30min	kd 45min	kd 60min	dead 24hrs
0.05% ƛ-cyhalothrin_1	25	0	2	5	7	11	12	13				0.05% ƛ-cyhalothrin_1	8	20	28	44	48
0.05% ƛ-cyhalothrin_2	25	0	1	3	4	9	13	12				0.05% ƛ-cyhalothrin_2	4	12	16	36	52
0.05% ƛ-cyhalothrin_3	25	0	0	2	4	10	11	14				0.05% ƛ-cyhalothrin_3	0	8	16	40	44
0.05% ƛ-cyhalothrin_4	25	0	1	8	10	12	16	9				0.05% ƛ-cyhalothrin_4	4	32	40	48	64
												averag morty	4	18	25	42	52
												std dev	3.26599	10.583	11.4891	5.16398	8.64099
Insecticide	No. of Mosq.	Dead 0min	kd 15min	kd 30min	kd 45min	kd 60min	dead 24hrs	alive 24hrs				Insecticide	kd 15min	kd 30min	kd 45min	kd 60min	dead 24hrs
4% DDT_1	25	0	0	0	0	0	2	23				4% DDT_1	0	0	0	0	8
4% DDT_2	25	0	0	0	0	0	0	25				4% DDT_2	0	0	0	0	0
4% DDT_3	25	0	0	0	0	0	1	24				4% DDT_3	0	0	0	0	4
4% DDT_4	25	0	0	0	0	0	0	25				4% DDT_4	0	0	0	0	0
COTROL	25	0	0	0	0	0	0	26				averag morty	0	0	0	0	3
												std dev	0	0	0	0	3.82971
Insecticide	No. of Mosq.	Dead 0min	kd 15min	kd 30min	kd 45min	kd 60min	dead 24hrs	alive 24hrs				Insecticide	kd 15min	kd 30min	kd 45min	kd 60min	dead 24hrs
4% Dieldrin_1	25	0	0	4	15	22	25	0				4% Dieldrin_1	0	16	60	88	100
4% Dieldrin_2	25	0	0	5	13	25	25	0				4% Dieldrin_2	0	20	52	100	100
4% Dieldrin_3	25	0	0	7	17	25	25	0				4% Dieldrin_3	0	28	68	100	100
4% Dieldrin_4	25	0	0	6	16	24	25	0				4% Dieldrin_4	0	24	64	96	100
												averag morty	0	22	61	96	100
												std dev	0	5.16398	6.8313	5.65685	0
Insecticide	No. of Mosq.	Dead 0min	kd 15min	kd 30min	kd 45min	kd 60min	dead 24hrs	alive 24hrs				Insecticide	kd 15min	kd 30min	kd 45min	kd 60min	dead 24hrs
0.10% Propoxur1	25	0	0	4	15	14	19	6				0.10% Propoxur1	0	16	60	56	76
0.10% Propoxur2	25	0	0	7	11	12	21	4				0.10% Propoxur2	0	28	44	48	84
0.10% Propoxur3	25	0	0	3	15	18	15	4				0.10% Propoxur3	0	12	60	72	60
0.10% Propoxur4	25	0	0	2	11	16	19					0.10% Propoxur4	0	8	44	64	76
												averag morty	0	16	52	60	74
												std dev	0	8.64099	9.2376	10.328	10.0664
Insecticide	No. of Mosq.	Dead 0min	kd 15min	kd 30min	kd 45min	kd 60min	dead 24hrs	alive 24hrs				Insecticide	kd 15min	kd 30min	kd 45min	kd 60min	dead 24hrs
1.0% Fenitrothion1	25	0	0	0	0	0	24	0				1.0% Fenitrothion1	0	0	0	0	96
1.0% Fenitrothion2	25	0	0	0	0	0	23	0				1.0% Fenitrothion2	0	0	0	0	92
1.0% Fenitrothion3	25	0	0	0	0	0	24	0				1.0% Fenitrothion3	0	0	0	0	96
1.0% Fenitrothion4	25	0	0	0	0	0	25	0				1.0% Fenitrothion4	0	0	0	0	100
control	25	0	0	0	0	0	0	20				averag morty	0	0	0	0	96
												std dev	0	0	0	0	3.26599
Insecticide	No. of Mosq.	Dead 0min	kd 15min	kd 30min	kd 45min	kd 60min	dead 24hrs	alive 24hrs				Insecticide	kd 15min	kd 30min	kd 45min	kd 60min	dead 24hrs
20% DDT_1	25	0	1	1	4	4	12	13				20% DDT_1	4	4	16	16	48
20% DDT_2	25	0	0	0	1	5	6	19				20% DDT_2	0	0	4	20	24
20% DDT_3	25	0	1	1	3	6	8	17				20% DDT_3	4	4	12	24	32
20% DDT_4	25	0	0	0	3	8	16	9				20% DDT_4	0	0	12	32	64
COTROL	25	0	0	0	0	0	0	25				averag morty	2	2	11	23	42
												std dev	2.3094	2.3094	5.03322	6.8313	17.7388
Insecticide	No. of Mosq.	Dead 0min	kd 15min	kd 30min	kd 45min	kd 60min	dead 24hrs	alive 24hrs				Insecticide	kd 15min	kd 30min	kd 45min	kd 60min	dead 24hrs
40% DDT_1	25	0	1	4	14	19	19	6				40% DDT_1	4	16	56	76	76
40% DDT_2	25	0	3	7	11	11	21	4				40% DDT_2	12	28	44	44	84
40% DDT_3	25	0	2	5	10	12	19	6				40% DDT_3	8	20	40	48	76
40% DDT_4	25	0	2	5	12	16	18	7				40% DDT_4	8	20	48	64	72
COTROL	25	0	0	0	0	0	0	25				averag morty	8	21	47	58	77
												std dev	3.26599	5.03322	6.8313	14.7874	5.03322
	Insecticide	No. of Mosq.	Dead 0min	kd 15min	kd 30min	kd 45min	kd 60min	dead 24hrs	alive 24hrs		THE GREEN COLOUR		Insecticide	kd 15min	kd 30min	kd 45min	kd 60min	dead 24hrs
	DDT_1	20	0	0	1	3	7	19	1		ARE EXPERIMENT WITH		DDT1	0	5	15	35	95
	DDT_2	20	0	0	0	2	6	20	0		AEDES FROM		DDT2	0	0	9.52381	28.5714	100
	DDT_3	20	0	0	0	1	2	16	4		GOMBE		DDT3	0	0	5	10	80
	DDT_4	20	0	0	1	3	5	20	0				DDT4	0	5	15	25	100
	COTROL	26	0	0	0	0	0	0	26				averag morty	0	2.5	11.131	24.6429	93.75
													std dev	0	2.88675	4.83427	10.6026	0
				SYNERGIST ASSAYS
Insecticide	No. of Mosq.	Dead 0min	8%DEM(1HR)	kd 15min	kd 30min	kd 45min	kd 60min	dead 24hrs	alive 24hrs			Insecticide	kd 15min	kd 30min	kd 45min	kd 60min	dead 24hrs
4% DDT_1	25	0	0	0	5	7	11	19	6			4% DDT_1	0	0	20	28	44
4% DDT_2	25	0	0	0	3	4	6	21	4			4% DDT_2	0	0	12	16	24
4% DDT_3	25	0	0	0	2	7	9	17	8			4% DDT_3	0	0	8	28	36
4% DDT_4	25	0	0	0	1	4	4	19	6			4% DDT_4	0	0	4	16	16
CONTROL	25	0	0	0	0	0	0	0	25			averag morty	0	0	11	22	30
												std dev	0	0	6.8313	6.9282	12.4365
Insecticide	No. of Mosq.	Dead 0min	8%PBO (1HR)	kd 15min	kd 30min	kd 45min	kd 60min	dead 24hrs	alive 24hrs			Insecticide	kd 15min	kd 30min	kd 45min	kd 60min	dead 24hrs
0.05% ƛ-cyhalothrin_1	25	0	0	16	18	24	25	25	0			0.05% ƛ-cyhalothrin_1	0	64	72	96	100
0.05% ƛ-cyhalothrin_2	25	0	0	8	15	16	23	25	0			0.05% ƛ-cyhalothrin_2	0	32	60	64	92
0.05% ƛ-cyhalothrin_3	25	0	0	4	12	18	25	25	0			0.05% ƛ-cyhalothrin_3	0	16	48	72	100
0.05% ƛ-cyhalothrin_4	25	0	0	9	16	22	25	25	0			0.05% ƛ-cyhalothrin_4	0	36	64	88	100
CONTROL	25	0	0	0	0	0	0	2	23			averag morty	0	37	61	80	98
												std dev	0	19.9666	10	14.6059	4
				QUANTITATIVE BIOASSAY
Insecticide	No. of Mosq.	Dead 1hr	Dead-2hrs	Dead-3 hrs	Dead-4 hrs	Dead 5 hrs	Dead 6hrs	Dead 7hrs	Dead 8hrs	Dead 9Hrs		Insecticide	Dead 1hr	Dead-2hrs	Dead-3 hrs	Dead-4 hrs	Dead 5 hrs	Dead 6hrs	Dead 7hrs	Dead 8hrs	Dead 9Hrs	0
DDT1	25	1	5	4	5	6	13	15	9	19		4% DDT1	4	20	16	20	24	52	60	36	76	5
DDT2	25	1	3	2	6	10	9	11	17	22		4% DDT2	4	12	8	24	40	36	44	68	88	16
DDT3	25	0	3	4	7	4	10	8	9	24		4% DDT3	0	12	16	28	16	40	32	36	96	29
DDT4	25	0	1	4	5	9	0	0	0	0		4% DDT4	0	4	16	20	36	0	0	0	0	43
CONTROL	25	0	0	0	0	0	0	0	0	0		average	2	12	14	23	29	42.6667	45.3333	46.6667	86.6667	49
												stdev	2.3094	6.53197	4	3.82971	11.0151	8.32666	14.0475	18.4752	10.0664	54
																						63
																						83
					WHO CONE BIOASSAY
																13	18
INSECTICIDE	No OF MOSQ.	DEAD 0MIN	KD 1HR	DEAD 24HRS	ALIVE 24HRS		INSECTICIDE	No OF MOSQ.	DEAD 0MIN	KD 1HR	DEAD 24HRS					17	11
Side-PermaNet®3.0-1	5	0	1	2			Roof-PermaNet®3.0-1	5	0	4	5					15	9
Side-PermaNet®3.0-2	5	0	1	4			Roof-PermaNet®3.0-2	5	0	5	5					9	11
Side-PermaNet®3.0-3	5	0	3	5			Roof-PermaNet®3.0-3	5	0	3	5					0	0
Side-PermaNet®3.0-4	5	0	4	4			Roof-PermaNet®3.0-4	5	0	3	5
Side-PermaNet®3.0-5	5	0	3	3			Roof-PermaNet®3.0-5	5	0	3	5
Side-PermaNet®3.0-6	5	0	3	5			Roof-PermaNet®3.0-6	5	0	4	5
Side-PermaNet®3.0-7	5	0	2	3			Roof-PermaNet®3.0-7	5	0	5	5
Side-PermaNet®3.0-8	5	0	2	5			Roof-PermaNet®3.0-8	5	0	5	5
Side-PermaNet®3.0-9	5	0	2	4			Roof-PermaNet®3.0-9	5	0	4	5
Side-PermaNet®3.0-10	5	0	3	5			Roof-PermaNet®3.0-10	5	0	5	5
Side-PermaNet®3.0-11	5	0	2	2			Roof-PermaNet®3.0-11	5	0	3	5
Side-PermaNet®3.0-12	5	0	2	5			Roof-PermaNet®3.0-12	5	0	5	5
Side-PermaNet®3.0-13	5	0	1	2			Roof-PermaNet®3.0-13	5	0	5	5
Side-PermaNet®3.0-14	5	0	3	4			Roof-PermaNet®3.0-14	5	0	4	5
Side-PermaNet®3.0-15	5	0	2	2			Roof-PermaNet®3.0-15	5	0	3	5
Side-PermaNet®3.0-16	5	0	2	3			Roof-PermaNet®3.0-16	5	0	3	5
Side-PermaNet®3.0-17	5	0	2	2			Roof-PermaNet®3.0-17	5	0	3	5
Side-PermaNet®3.0-18	5	0	2	3			Roof-PermaNet®3.0-18	5	0	2	5
Side-PermaNet®3.0-19	5	0	1	2			Roof-PermaNet®3.0-19	5	0	5	5
Side-PermaNet®3.0-20	5	0	2	4			Roof-PermaNet®3.0-20	5	0	3	5
Side-PermaNet®3.0-21	5	0	2	5			Roof-PermaNet®3.0-21	5	0	3	5
Side-PermaNet®3.0-22	5	0	3	4			Roof-PermaNet®3.0-22	5	0	3	5
Side-PermaNet®3.0-23	5	0	2	3			Roof-PermaNet®3.0-23	5	0	4	5
Side-PermaNet®3.0-24	5	0	2	5			Roof-PermaNet®3.0-24	5	0	5	5
Side-PermaNet®3.0-25	5	0	1	3			Roof-PermaNet®3.0-25	5	0	5	5
Side-PermaNet®3.0-26	5	0	2	2			Roof-PermaNet®3.0-26	5	0	4	5
Side-PermaNet®3.0-27	5	0	2	5			Roof-PermaNet®3.0-27	5	0	3	5
Side-PermaNet®3.0-28	5	0	2	4			Roof-PermaNet®3.0-28	5	0	5	5
Side-PermaNet®3.0-29	5	0	1	4			Roof-PermaNet®3.0-29	5	0	4	5
Side-PermaNet®3.0-30	5	0	1	4			Roof-PermaNet®3.0-30	5	0	3	5
Side-PermaNet®3.0-31	5	0	2	5			Roof-PermaNet®3.0-31	5	0	4	5
Side-PermaNet®3.0-32	5	0	2	3			Roof-PermaNet®3.0-32	5	0	4	5
Side-PermaNet®3.0-33	5	0	1	3			Roof-PermaNet®3.0-33	5	0	3	5
Side-PermaNet®3.0-34	5	0	1	5			Roof-PermaNet®3.0-34	5	0	5	5
Side-PermaNet®3.0-35	5	0	2	5			Roof-PermaNet®3.0-35	5	0	3	5
Side-PermaNet®3.0-36	5	0	2	2			Roof-PermaNet®3.0-36	5	0	5	5
Side-PermaNet®3.0-37	5	0	2	2			Roof-PermaNet®3.0-37	5	0	5	5
Side-PermaNet®3.0-38	5	0	1	4			Roof-PermaNet®3.0-38	5	0	5	5
Side-PermaNet®3.0-39	5	0	2	4			Roof-PermaNet®3.0-39	5	0	4	5
Side-PermaNet®3.0-40	5	0	5	5			Roof-PermaNet®3.0-40	5	0	4	5
Side-PermaNet®3.0-41	5	0	3	3			Roof-PermaNet®3.0-41	5	0	5	5
Side-PermaNet®3.0-42	5	0	1	2			Roof-PermaNet®3.0-42	5	0	5	5
Side-PermaNet®3.0-43	5	0	2	4			Roof-PermaNet®3.0-43	5	0	4	5
Side-PermaNet®3.0-44	5	0	3	4			Roof-PermaNet®3.0-44	5	0	3	5
Side-PermaNet®3.0-45	5	0	2	5			Roof-PermaNet®3.0-45	5	0	5	5
Side-PermaNet®3.0-46	5	0	1	5			Roof-PermaNet®3.0-46	5	0	3	5
Side-PermaNet®3.0-47	5	0	2	4			Roof-PermaNet®3.0-47	5	0	3	5
Side-PermaNet®3.0-48	5	0	1	3			Roof-PermaNet®3.0-48	5	0	3	5
Side-PermaNet®3.0-49	5	0	1	3			Roof-PermaNet®3.0-49	5	0	4	5
Side-PermaNet®3.0-50	5	0	4	5			Roof-PermaNet®3.0-50	5	0	4	5
Average	5	0	2.02	3.68			Average	5	0	3.94	5
stdev		0	0.891914	1.11465			stdev		0	0.890081	0
